# Supplementary material for: Exome-wide association analysis reveals novel coding sequence variants associated with lipid traits in Chinese
Source: PubMed Central journal article supplement (PMC4703860; doi:10.1038/ncomms10206), 2015-12-22
Supplement: ncomms10206-s1.pdf [file ncomms10206-s1.pdf]

## Supplementary Figures

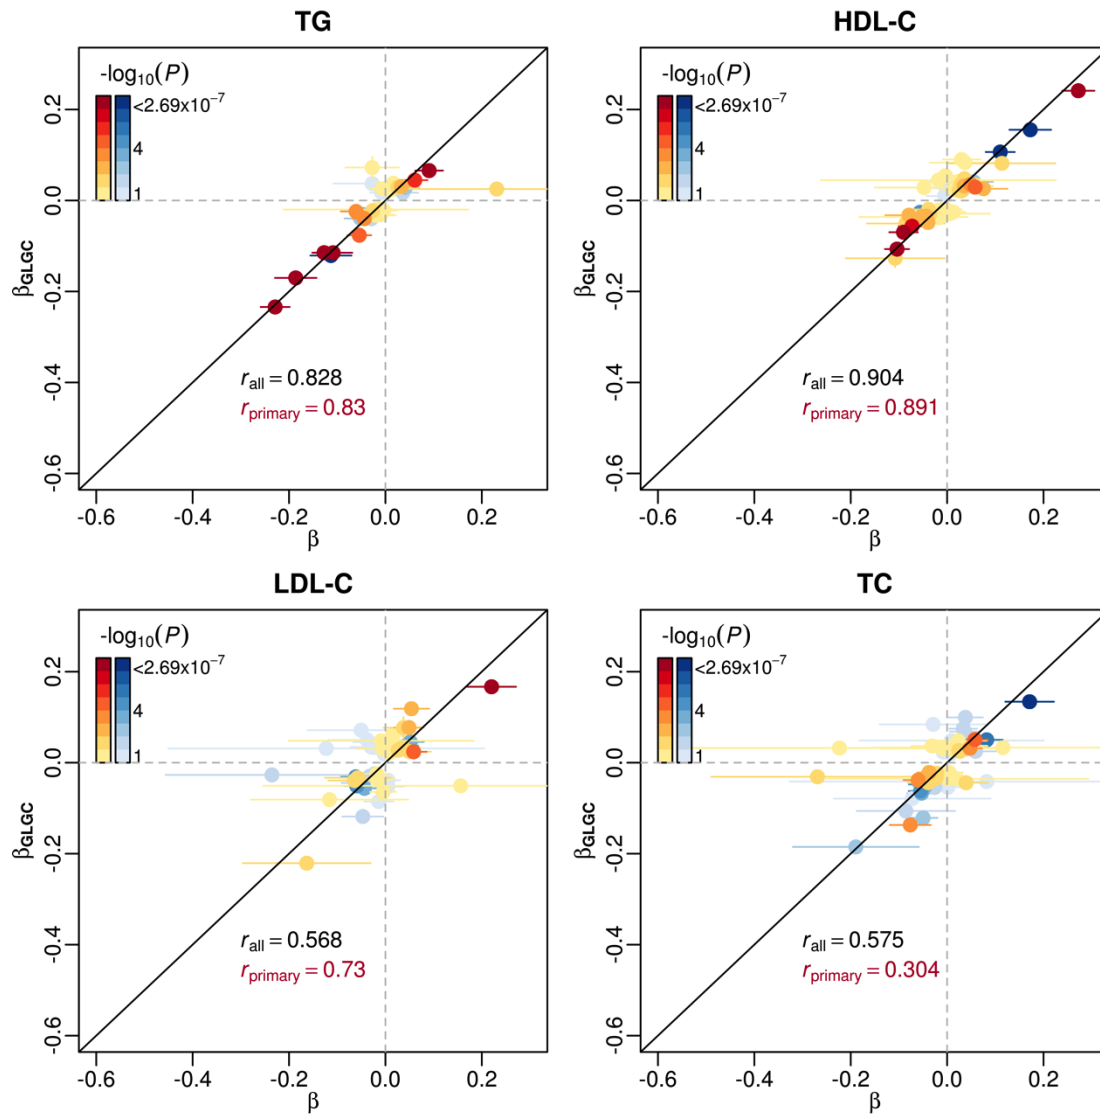

**Supplementary Figure 1. Association evidence for genome-wide significant loci (n=157) reported in GLGC *et al.* (2013)<sup>1</sup>.** Standardized effects ( $\beta$ , in s.d.) of primary (red) and secondary (blue) lipid traits estimated in GLGC on Europeans are plotted against estimates on Chinese. Error bars indicate the 95% confidence intervals. The theoretical lines of equality and Pearson correlation coefficients ( $r$ ) for effects of primary and all traits are shown.

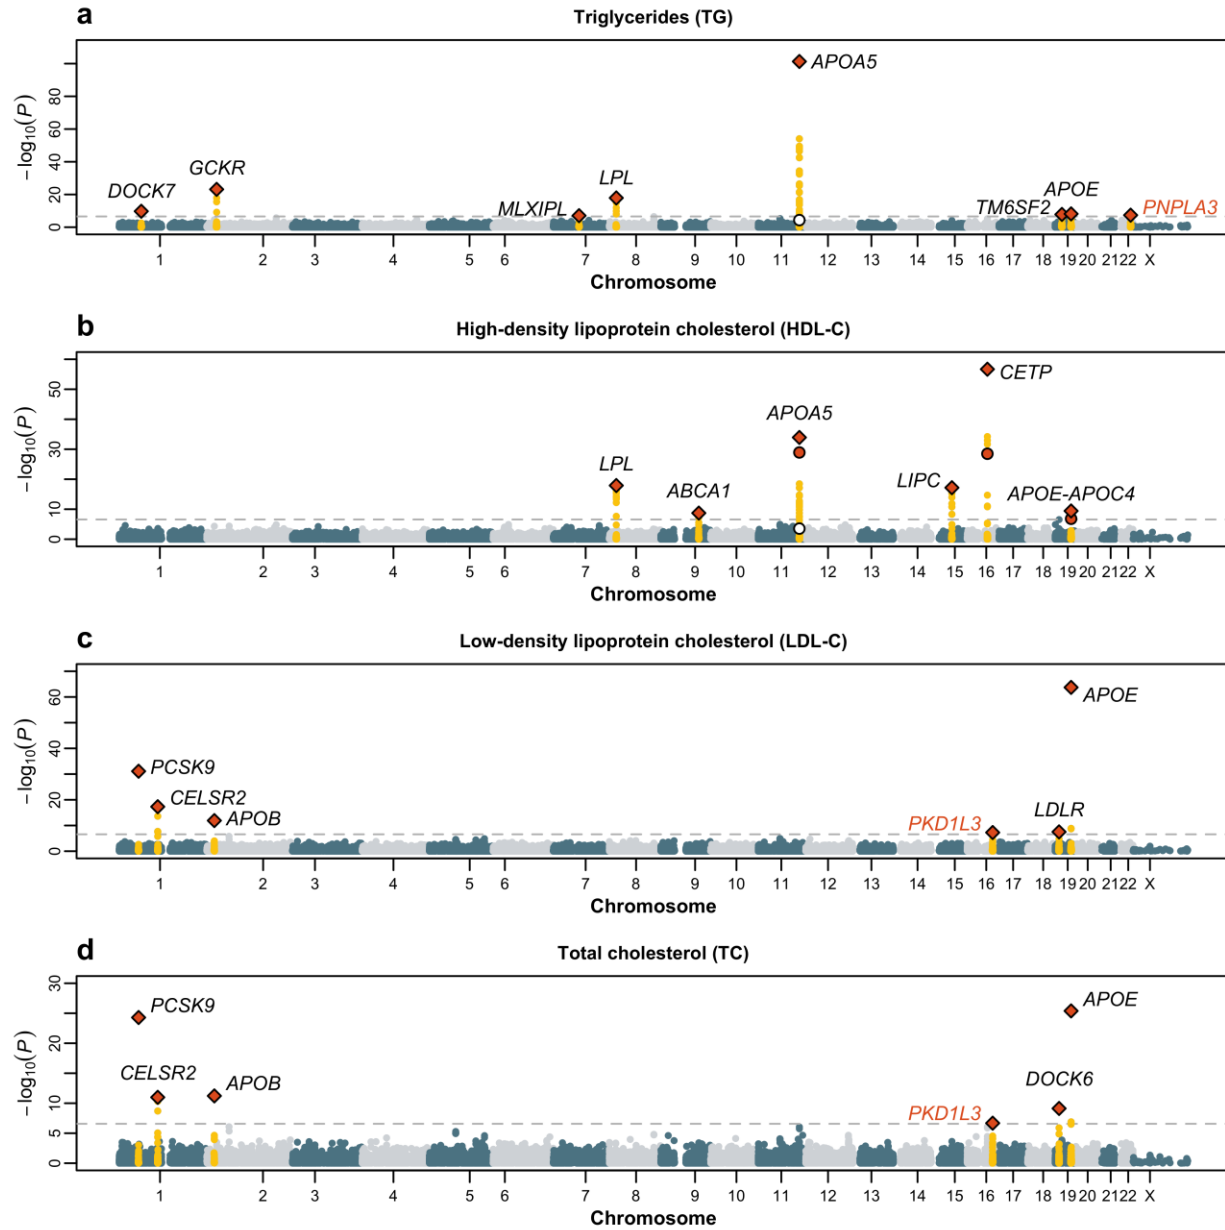

**Supplementary Figure 2. Manhattan plot of association  $P$ -values for (a) TG, (b) HDL-C, (c) LDL-C and (d) TC. SNPs within loci ( $\pm 1$ Mb of top SNP) passing exome-wide significance (horizontal dash line;  $P < 2.69 \times 10^{-7}$ ) are labelled in yellow and the top SNP of each region are labelled separately in orange diamond. SNPs showing independent association after conditional analysis are denoted by circles.**

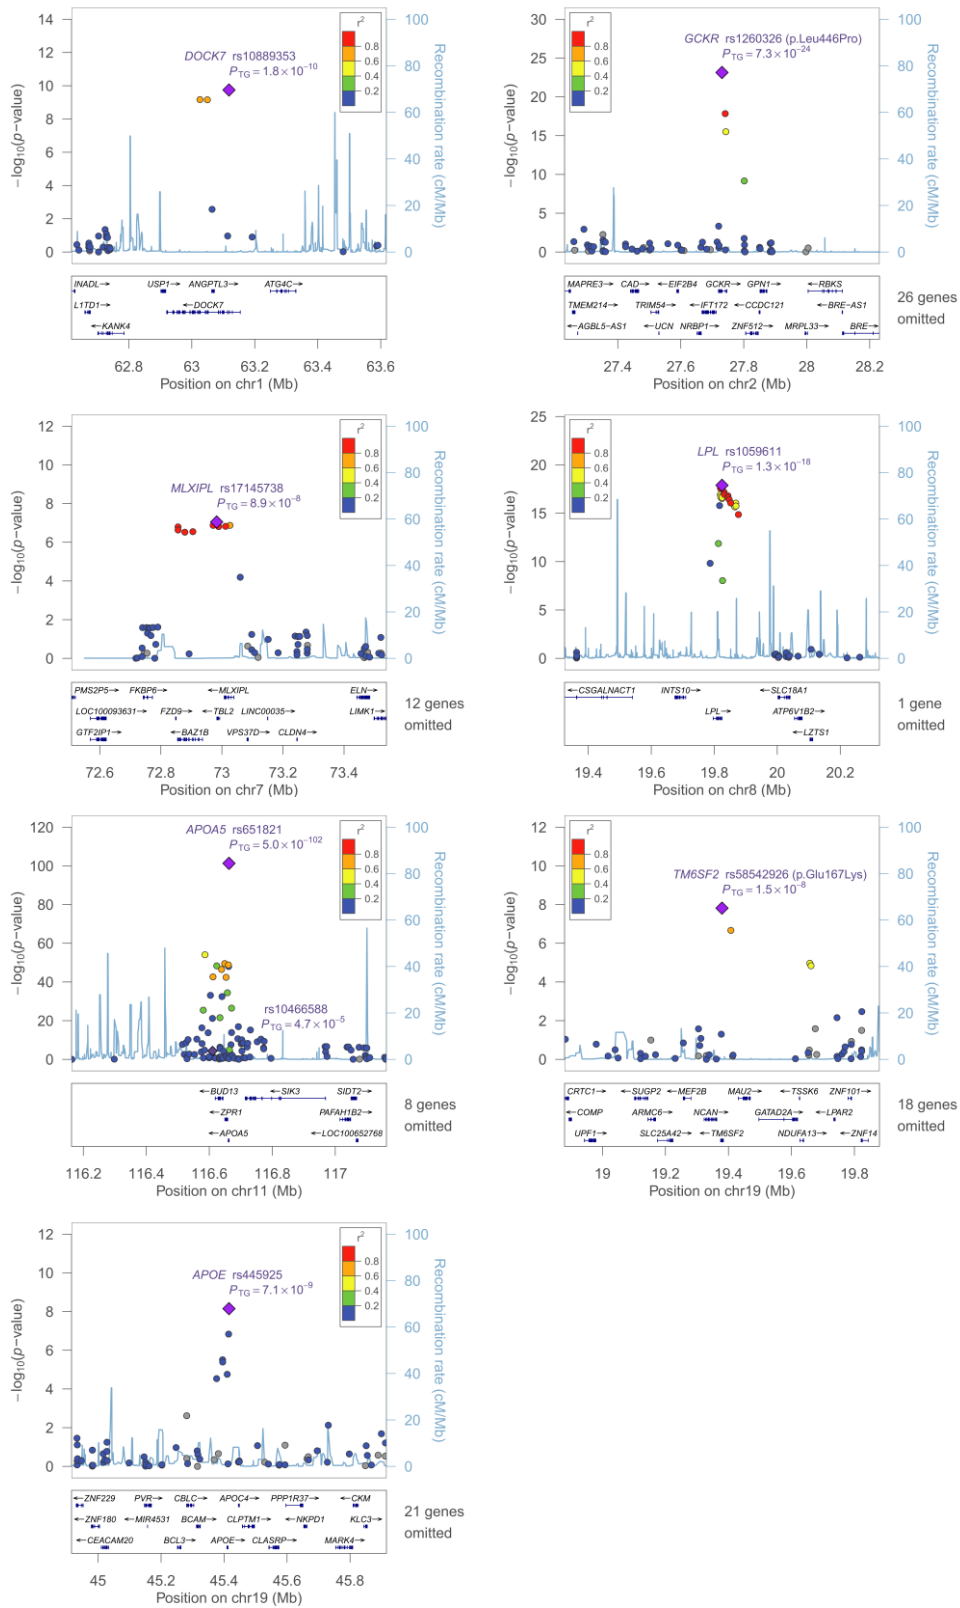

**Supplementary Figure 3. Regional plots of known loci showing exome-wide significant association for triglycerides.**

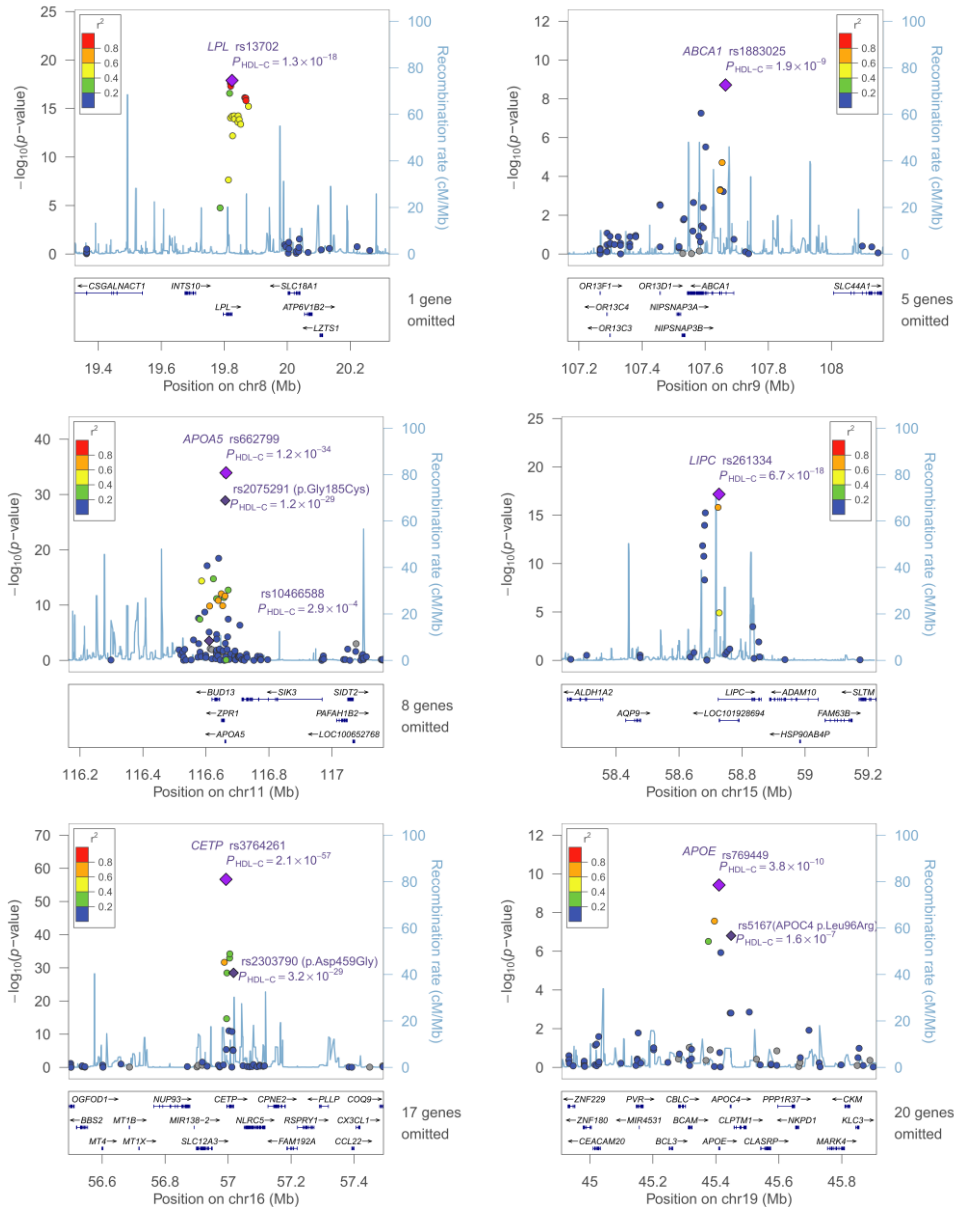

**Supplementary Figure 4. Regional plots of known loci showing exome-wide significant association for HDL cholesterol.**

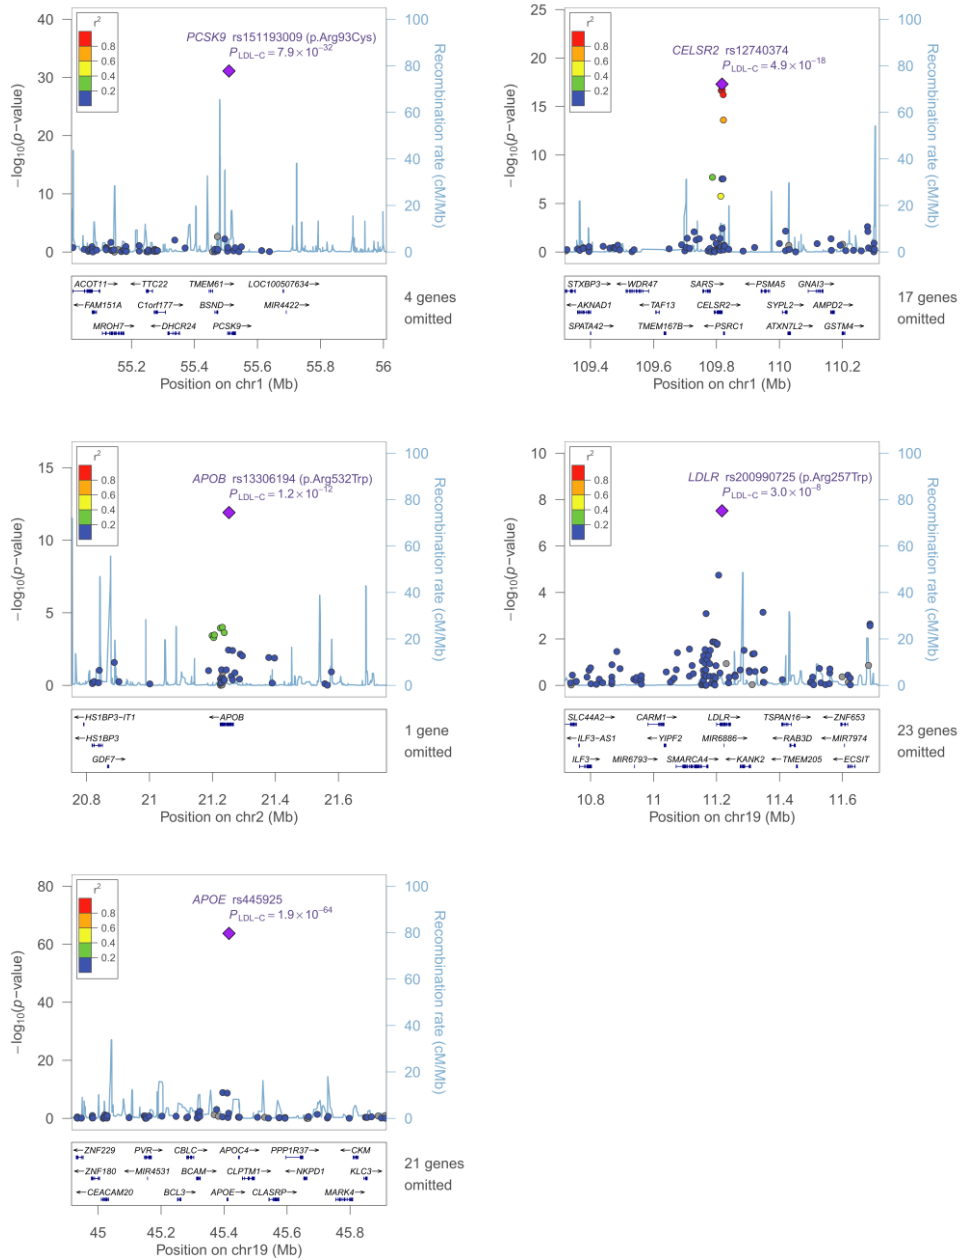

**Supplementary Figure 5. Regional plots of known loci showing exome-wide significant association for LDL cholesterol.**

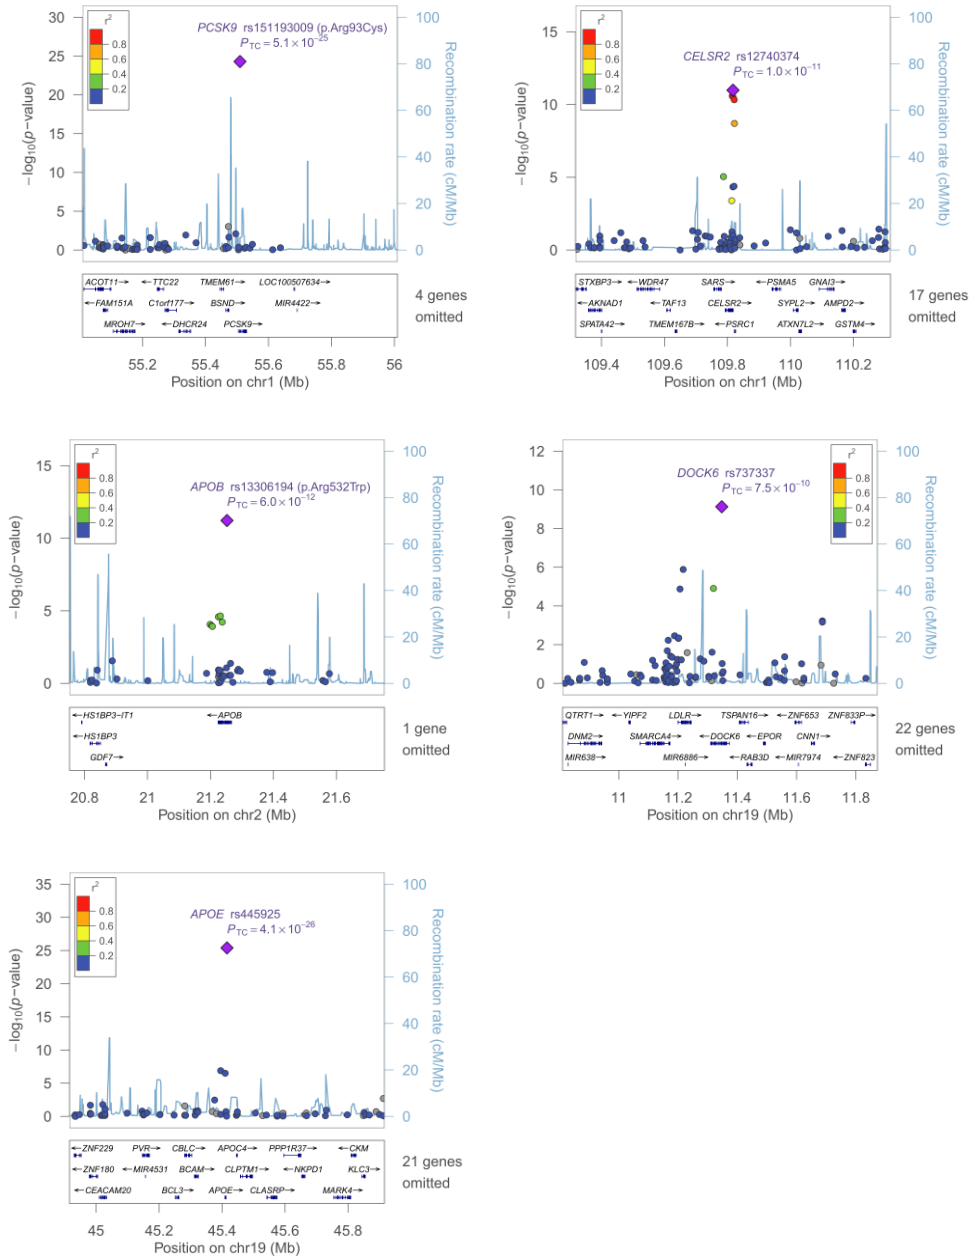

Supplementary Figure 6. Regional plots of known loci showing exome-wide significant association for total cholesterol.

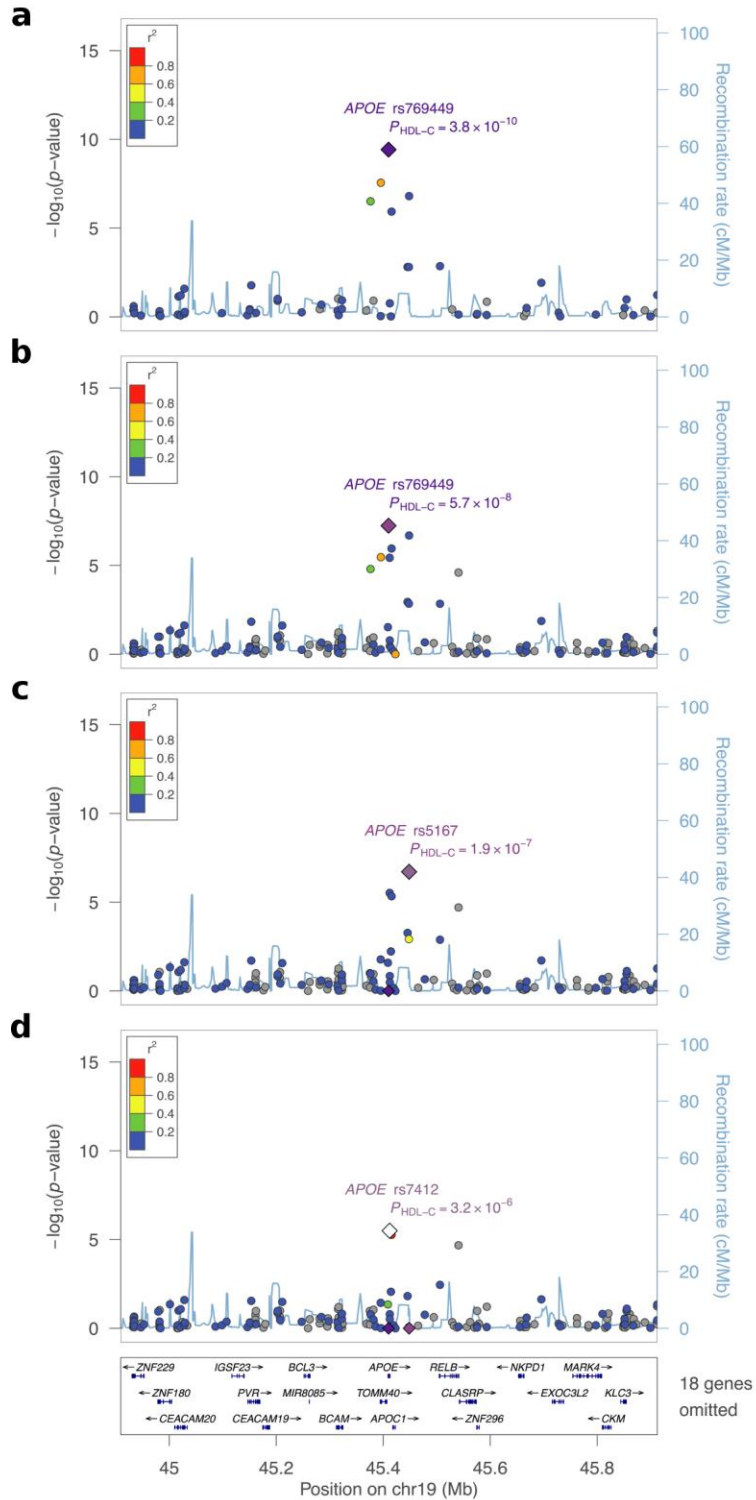

**Supplementary Figure 7. Regional plots of conditional analysis between *APOE* and HDL cholesterol.** Association  $p$ -values are shown (a) before and after stepwise conditioning on (b) known SNPs (rs4420638) and then (c) rs769449 as well as (d) rs5167.

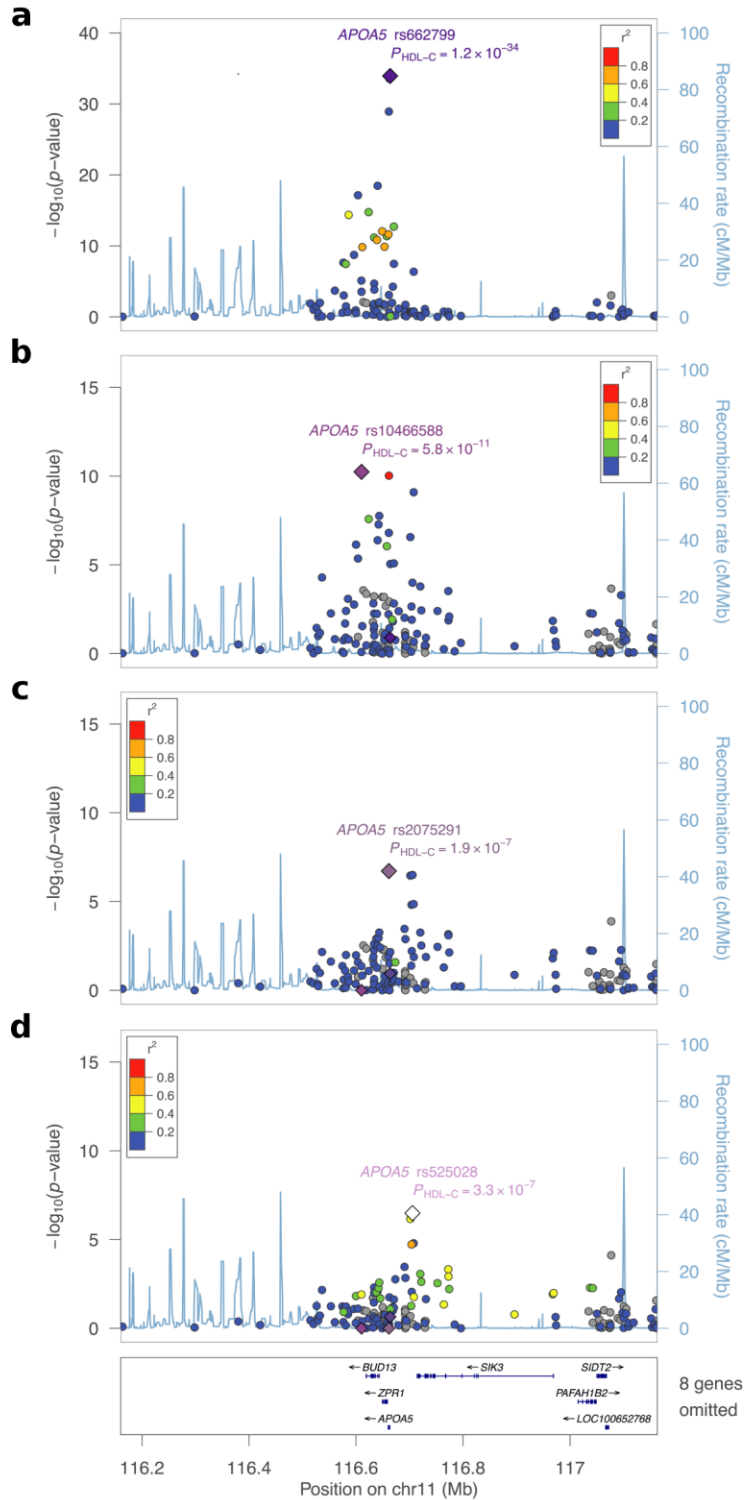

**Supplementary Figure 8. Regional plots of conditional analysis between *APOA5* and HDL cholesterol.** Association  $p$ -values are shown (a) before and after stepwise conditioning on (b) known SNPs (rs964184 and rs651821) and (c) rs10466588 as well as (d) rs2075291.



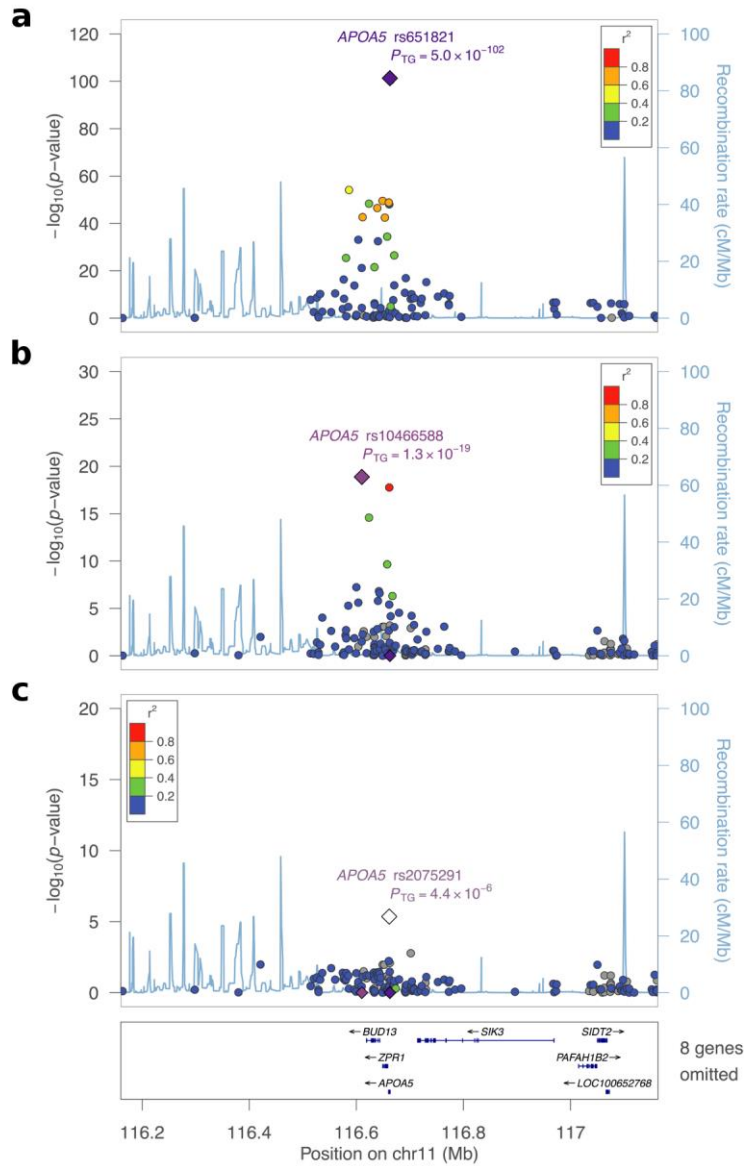

**Supplementary Figure 9. Regional plots of conditional analysis between *APOA5* and triglycerides.**

Association  $p$ -values are shown (a) before and after stepwise conditioning on (b) known SNPs (rs964184 and rs651821) and then (c) rs10466588.

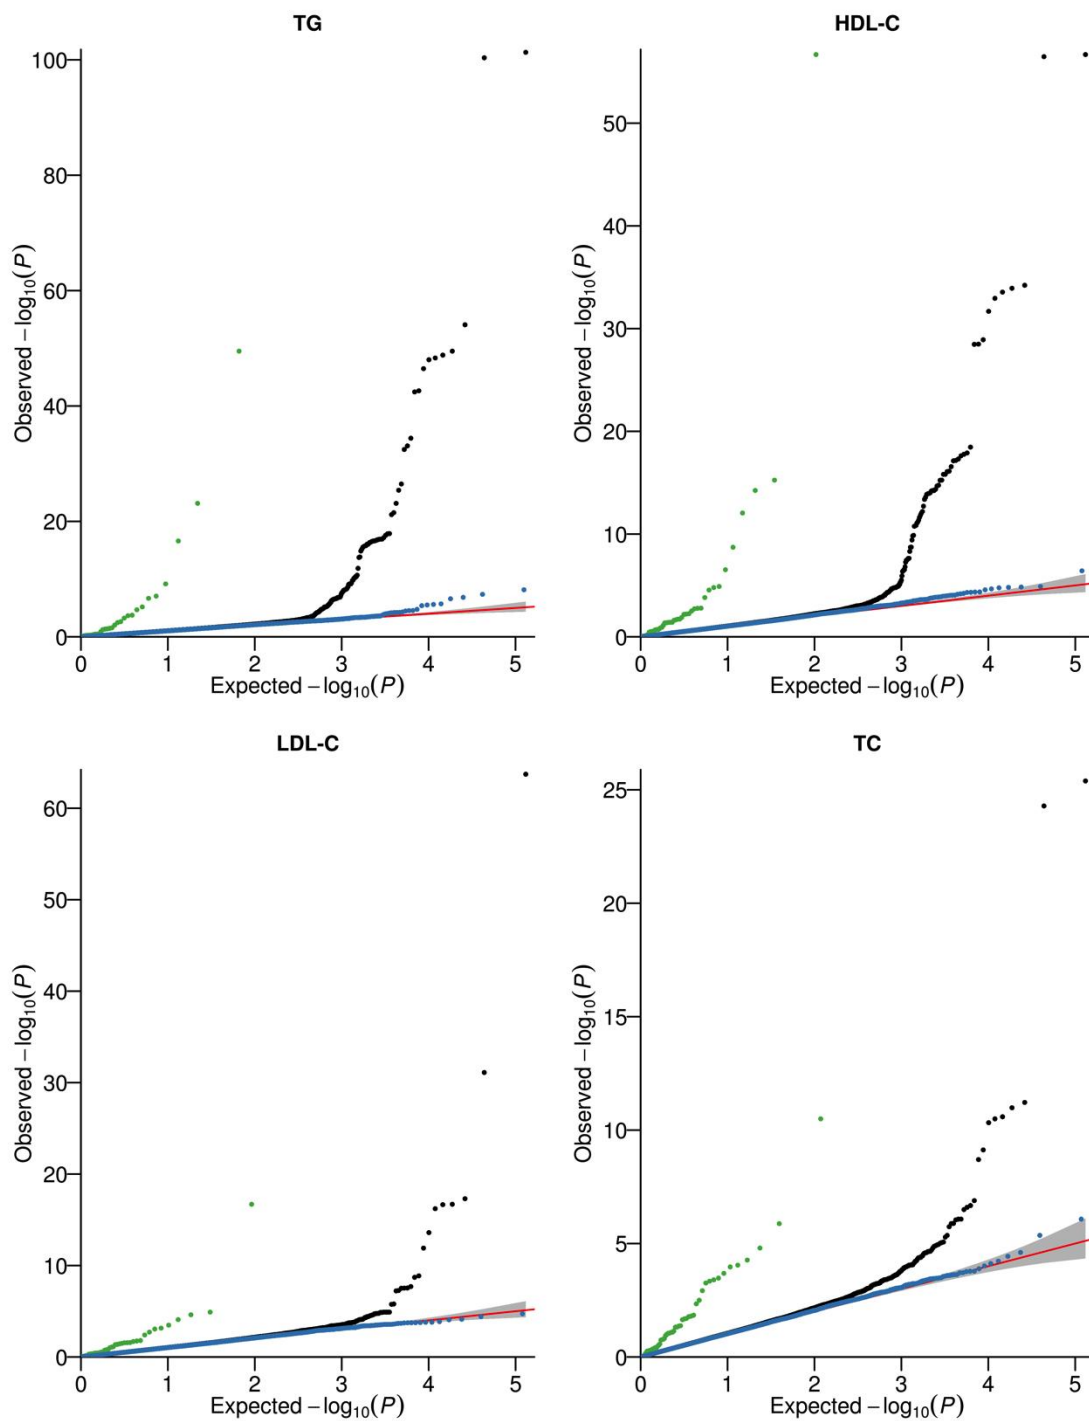

**Supplementary Figure 10. Quantile-quantile plots of association P-values for TG, HDL-C, LDL-C and TC.**

Associations for all SNPs tested are represented in black. Green circles represent associations for 157 loci reported in GLGC *et al.* (2013)<sup>1</sup> while blue circles denotes the association after removal of SNPs mapping to the 157 known loci ( $\pm 1$ Mb).

## Supplementary Tables

**Supplementary Table 1.** Summary of polymorphic variants in the combined dataset.

| Variant type                  | Frequency      | Number of variants genotyped | Number of custom markers <sup>a</sup> | Number of variants in 1000G | Number of Asian-specific variants <sup>b</sup> |
|-------------------------------|----------------|------------------------------|---------------------------------------|-----------------------------|------------------------------------------------|
| Damaging protein-altering     | > 5%           | 5,160                        | 43 (0.83)                             | 5,121                       | 243 (4.75)                                     |
|                               | 1-5%           | 3,964                        | 216 (5.45)                            | 3,862                       | 2,184 (56.55)                                  |
|                               | 20 copies - 1% | 16,812                       | 7,641 (45.45)                         | 11,031                      | 8,351 (75.70)                                  |
|                               | 1-19 copies    | 45,440                       | 9,825 (21.62)                         | 21,743                      | 4,715 (21.69)                                  |
| Non-damaging protein-altering | > 5%           | 5,929                        | 71 (1.20)                             | 5,886                       | 123 (2.09)                                     |
|                               | 1-5%           | 2,347                        | 133 (5.67)                            | 2,300                       | 936 (40.70)                                    |
|                               | 20 copies - 1% | 6,951                        | 2,876 (41.38)                         | 4,849                       | 3,130 (64.55)                                  |
|                               | 1-19 copies    | 16,706                       | 3,247 (19.44)                         | 9,222                       | 1,544 (16.74)                                  |
| Total                         | > 5%           | 41,693                       | 17,031 (40.85)                        | 41,548                      | 761 (1.83)                                     |
|                               | 1-5%           | 10,757                       | 3,648 (33.91)                         | 10,588                      | 5,018 (47.39)                                  |
|                               | 20 copies - 1% | 26,846                       | 12,524 (46.65)                        | 18,692                      | 13,053 (69.83)                                 |
|                               | 1-19 copies    | 65,980                       | 14,400 (21.82)                        | 33,628                      | 7,206 (21.43)                                  |
|                               | <b>Total</b>   |                              | <b>145,276</b>                        | <b>47,603 (32.77)</b>       | <b>104,456</b>                                 |

<sup>a</sup> Proportion of custom makers relative to genotyped are shown in bracket

<sup>b</sup> Proportion of Asian-specific makers relative to all present in 1000G are shown in bracket

**Supplementary Table 2.** Summary of variants included in single-variant association analysis.

| Variant type                  | Frequency      | Number of variants genotyped | Number of custom markers <sup>a</sup> | Number of variants in 1000G | Number of Asian-specific variants <sup>b</sup> |
|-------------------------------|----------------|------------------------------|---------------------------------------|-----------------------------|------------------------------------------------|
| Damaging protein-altering     | > 5%           | 4,697                        | 34 (0.72)                             | 4,674                       | 224 (4.79)                                     |
|                               | 1-5%           | 3,640                        | 181 (4.97)                            | 3,567                       | 2,014 (56.46)                                  |
|                               | 20 copies - 1% | 15,773                       | 7,163 (45.41)                         | 10,360                      | 7,856 (75.83)                                  |
| Non-damaging protein-altering | > 5%           | 5,256                        | 61 (1.16)                             | 5,226                       | 105 (2.01)                                     |
|                               | 1-5%           | 2,112                        | 112 (5.3)                             | 2,071                       | 863 (41.67)                                    |
|                               | 20 copies - 1% | 6,466                        | 2,684 (41.51)                         | 4,509                       | 2,918 (64.72)                                  |
| Total                         | > 5%           | 31,100                       | 15,616 (50.21)                        | 31,003                      | 682 (2.2)                                      |
|                               | 1-5%           | 9,531                        | 3,257 (34.17)                         | 9,404                       | 4,604 (48.96)                                  |
|                               | 20 copies - 1% | 25,040                       | 11,703 (46.74)                        | 17,413                      | 12,250 (70.35)                                 |
|                               | <b>Total</b>   | <b>65,671</b>                | <b>30,576 (46.56)</b>                 | <b>57,820</b>               | <b>17,536 (30.33)</b>                          |

<sup>a</sup> Proportion of custom makers relative to genotyped are shown in bracket

<sup>b</sup> Proportion of Asian-specific makers relative to all present in 1000G are shown in bracket

**Supplementary Table 3.** Summary of association with GWAS SNPs in combined data (N=12,685).

| Lipid trait | GWAS variants <sup>a</sup> |     |                            | SNPs with $P < 5 \times 10^{-8}$ |                |                       | SNPs with $P < 0.05$ |                |                       | SNPs with concordant direction of effect |                |                       |
|-------------|----------------------------|-----|----------------------------|----------------------------------|----------------|-----------------------|----------------------|----------------|-----------------------|------------------------------------------|----------------|-----------------------|
|             | Total                      | QC+ | MAC $\geq 20$ <sup>b</sup> | N (% <sup>c</sup> ),<br>Observed | N,<br>Expected | $P$ <sup>d</sup>      | N (%),<br>Observed   | N,<br>Expected | $P$                   | N (%),<br>Observed                       | N,<br>Expected | $P$                   |
| HDL-C       | 60                         | 44  | 43                         | 3 (7.0)                          | 0              | $1.5 \times 10^{-18}$ | 22 (51.2)            | 2.15           | $9.0 \times 10^{-18}$ | 37 (86.0)                                | 21.5           | $8.2 \times 10^{-7}$  |
| LDL-C       | 30                         | 26  | 24                         | 1 (4.2)                          | 0              | $1.2 \times 10^{-6}$  | 9 (37.5)             | 1.2            | $1.3 \times 10^{-6}$  | 21 (87.5)                                | 12             | $1.3 \times 10^{-4}$  |
| TC          | 39                         | 28  | 28                         | 0 (0)                            | 0              | 1                     | 8 (28.6)             | 1.4            | $4.9 \times 10^{-5}$  | 19 (67.9)                                | 14             | $4.4 \times 10^{-2}$  |
| TG          | 28                         | 25  | 24                         | 4 (16.7)                         | 0              | $6.6 \times 10^{-26}$ | 13 (52.2)            | 1.2            | $1.8 \times 10^{-11}$ | 22 (91.7)                                | 12             | $1.8 \times 10^{-5}$  |
| Total       | 157                        | 123 | 119                        | 8 (6.7)                          | 0              | $3.1 \times 10^{-47}$ | 52 (42.7)            | 5.95           | $1.5 \times 10^{-35}$ | 99 (83.2)                                | 59.5           | $4.6 \times 10^{-14}$ |

<sup>a</sup> GWAS variants refer to the index SNPs of the 157 loci associated with primary lipid traits in GLGC (2013)

<sup>b</sup> SNPs polymorphic in both Chinese cohorts and with minor allele count (MAC) greater than or equal to 20

<sup>c</sup> Number and proportion of SNPs attaining the corresponding significant levels among GWAS variants passing quality controls and with MAC  $\geq 20$

<sup>d</sup> P values were estimated using binominal distribution to test for excess of variants reaching significant levels or matching the direction with the null hypothesis of no association.

**Supplementary Table 4.** Summary of association for GWAS SNPs in HKUTRS (N=5,233) and PUUMA-MI (N=5,643).

| Lipid trait (Primary) | Study   | GWAS variants <sup>a</sup> |                           | SNPs with $P < 5 \times 10^{-8}$ |               | SNPs with $P < 0.05$ |               |
|-----------------------|---------|----------------------------|---------------------------|----------------------------------|---------------|----------------------|---------------|
|                       |         | Total                      | MAC $\geq 6$ <sup>b</sup> | Number                           | Percentage(%) | Number               | Percentage(%) |
| HDL-C                 | HKUTRS  | 60                         | 43                        | 1                                | 2.3           | 11                   | 25.6          |
|                       | HUNT-MI | 60                         | 44                        | 2                                | 4.5           | 19                   | 43.2          |
| LDL-C                 | HKUTRS  | 30                         | 23                        | 1                                | 4.2           | 5                    | 20.8          |
|                       | HUNT-MI | 30                         | 23                        | 2                                | 7.7           | 9                    | 34.6          |
| TC                    | HKUTRS  | 39                         | 25                        | 0                                | 0             | 5                    | 17.9          |
|                       | HUNT-MI | 39                         | 29                        | 0                                | 0             | 8                    | 27.6          |
| TG                    | HKUTRS  | 28                         | 23                        | 2                                | 8.3           | 11                   | 45.8          |
|                       | HUNT-MI | 28                         | 23                        | 3                                | 13.0          | 9                    | 39.1          |
| Total                 | HKUTRS  | 157                        | 119                       | 4                                | 3.4           | 32                   | 26.9          |
|                       | HUNT-MI | 157                        | 122                       | 7                                | 5.7           | 45                   | 36.9          |

<sup>a</sup> GWAS variants refer to the index SNPs of the 157 loci reported in GLGC (2013)

<sup>b</sup> SNPs passing quality control and with minor allele count (MAC) greater than or equal to 6 as evaluated in Holmen *et al.* (2013)

**Supplementary Table 5.** Association result of known triglycerides associated variants.

| Gene             | rs ID             | Position            | REF <sup>a</sup> | ALT      | FREQ <sup>b</sup> | Direction <sup>c</sup> | Effect                | s.e.         | P                            |
|------------------|-------------------|---------------------|------------------|----------|-------------------|------------------------|-----------------------|--------------|------------------------------|
| <b>ANGPTL3</b>   | <b>rs2131925</b>  | <b>1:63025942</b>   | <b>G</b>         | <b>T</b> | <b>0.759</b>      | <b>++</b>              | <b>0.091</b>          | <b>0.015</b> | <b>6.82x10<sup>-10</sup></b> |
| <b>GCKR</b>      | <b>rs1260326</b>  | <b>2:27730940</b>   | <b>T</b>         | <b>C</b> | <b>0.491</b>      | <b>--</b>              | <b>-0.127</b>         | <b>0.013</b> | <b>7.31x10<sup>-24</sup></b> |
| <i>MSL2L1</i>    | rs645040          | 3:135926622         | G                | T        | 0.879             | +-                     | 0.030                 | 0.019        | 0.125                        |
| <i>LRPAP1</i>    | rs6831256         | 4:3473139           | A                | G        | 0.362             | +-                     | -0.006                | 0.013        | 0.666                        |
| <i>KLHL8</i>     | rs442177          | 4:88030261          | G                | T        | 0.577             | ++                     | 0.033                 | 0.013        | 9.36x10 <sup>-3</sup>        |
| <i>MAP3K1</i>    | rs9686661         | 5:55861786          | C                | T        | 0.119             | +                      | 0.017                 | 0.020        | 0.399                        |
| <i>VEGFA</i>     | rs998584          | 6:43757896          | C                | A        | 0.572             | ++                     | 0.025                 | 0.013        | 0.047                        |
| <i>TYW1B</i>     | rs13238203        | 7:72129667          |                  |          |                   |                        | not on the exome chip |              |                              |
| <i>MLXIPL</i>    | rs17145738        | 7:72982874          | C                | T        | 0.111             | --                     | -0.109                | 0.020        | 8.93x10 <sup>-8</sup>        |
| <i>MET</i>       | rs38855           | 7:116358044         | A                | G        | 0.584             | +                      | -0.013                | 0.013        | 0.326                        |
| <i>PINX1</i>     | rs11776767        | 8:10683929          | G                | C        | 0.201             | ++                     | 0.009                 | 0.016        | 0.554                        |
| <i>NAT2</i>      | rs1495741         | 8:18272881          | G                | A        | 0.457             | --                     | -0.044                | 0.013        | 5.81x10 <sup>-4</sup>        |
| <b>LPL</b>       | <b>rs12678919</b> | <b>8:19844222</b>   | <b>A</b>         | <b>G</b> | <b>0.091</b>      | <b>--</b>              | <b>-0.186</b>         | <b>0.022</b> | <b>2.49x10<sup>-17</sup></b> |
| <i>TRIB1</i>     | rs2954029         | 8:126490972         | A                | T        | 0.567             | --                     | -0.054                | 0.013        | 2.08x10 <sup>-5</sup>        |
| <i>AKR1C4</i>    | rs1832007         | 10:5254847          | A                | G        | 0.101             | +                      | -0.020                | 0.021        | 0.352                        |
| <i>JMJD1C</i>    | rs10761731        | 10:65027610         | A                | T        | 0.317             | --                     | -0.010                | 0.014        | 0.475                        |
| <i>CYP26A1</i>   | rs2068888         | 10:94839642         | G                | A        | 0.811             | --                     | -0.061                | 0.016        | 1.81x10 <sup>-4</sup>        |
| <i>FADS1-2-3</i> | rs174546          | 11:61569830         | C                | T        | 0.469             | ++                     | 0.061                 | 0.014        | 6.62x10 <sup>-6</sup>        |
| <b>APOA1</b>     | <b>rs964184</b>   | <b>11:116648917</b> | <b>G</b>         | <b>C</b> | <b>0.784</b>      | <b>--</b>              | <b>-0.229</b>         | <b>0.015</b> | <b>3.11x10<sup>-50</sup></b> |
| <i>LRP1</i>      | rs11613352        | 12:57792580         | C                | T        | 0.094             |                        | QC- in PUUMA-MI       |              |                              |
| <i>CAPN3</i>     | rs2412710         | 15:42683787         | G                | A        | 0.000             |                        | Monomorphic in HKUTRS |              |                              |
| <i>FRMD5</i>     | rs2929282         | 15:44245931         | A                | T        | 0.053             | +-                     | -0.027                | 0.028        | 0.332                        |
| <i>PDXDC1</i>    | rs3198697         | 16:15129940         | C                | T        | 0.004             | +                      | -0.019                | 0.098        | 0.843                        |
| <i>CTF1</i>      | rs11649653        | 16:30918487         | C                | G        | 0.902             |                        | QC- in PUUMA-MI       |              |                              |

Variants with GWAS significant association are shown in bold

<sup>a</sup> REF and ALT: reference and alternative effector alleles with reference to human refence genome build hg19

<sup>b</sup> FREQ: Alternative effector allele frequencies

<sup>c</sup> Direction refers to the direction of effect estimates of HKUTRS and PUUMA-MI respectively

**Supplementary Table 5 (continued).** Association result of known triglycerides associated variants.

| <b>Gene</b>   | <b>rs ID</b> | <b>Position</b> | <b>REF<sup>a</sup></b> | <b>ALT</b> | <b>FREQ<sup>b</sup></b> | <b>Direction<sup>c</sup></b> | <b>Effect</b> | <b>s.e.</b> | <b>P</b> |
|---------------|--------------|-----------------|------------------------|------------|-------------------------|------------------------------|---------------|-------------|----------|
| <i>MPP3</i>   | rs8077889    | 17:41878166     | A                      | C          | 0.003                   | ++                           | 0.231         | 0.114       | 0.042    |
| <i>INSR</i>   | rs7248104    | 19:7224431      | G                      | A          | 0.311                   | +-                           | -0.003        | 0.014       | 0.800    |
| <i>PEPD</i>   | rs731839     | 19:33899065     | G                      | A          | 0.463                   | --                           | -0.027        | 0.013       | 0.035    |
| <i>PLA2G6</i> | rs5756931    | 22:38546033     | T                      | C          | 0.121                   | -+                           | -0.008        | 0.019       | 0.685    |



**Supplementary Table 6.** Association result of known HDL cholesterol associated variants.

| Gene              | rs ID      | Position    | REF <sup>a</sup> | ALT | FREQ <sup>b</sup> | Direction <sup>c</sup> | Effect                | s.e.  | P                     |
|-------------------|------------|-------------|------------------|-----|-------------------|------------------------|-----------------------|-------|-----------------------|
| <i>PIGV-NROB2</i> | rs12748152 | 1:27138393  | C                | T   | 0.024             | --                     | -0.086                | 0.041 | 0.038                 |
| <i>PABPC4</i>     | rs4660293  | 1:40028180  | A                | G   | 0.126             | --                     | -0.052                | 0.019 | 5.68X10 <sup>-3</sup> |
| <i>HDGF-PMVK</i>  | rs12145743 | 1:156700651 | T                | G   | 0.101             |                        | QC- in PUUMA-MI       |       |                       |
| <i>ANGPTL1</i>    | rs4650994  | 1:178515312 | G                | A   | 0.535             | --                     | -0.016                | 0.013 | 0.192                 |
| <i>ZNF648</i>     | rs1689800  | 1:182168885 | A                | G   | 0.294             | --                     | -0.043                | 0.014 | 1.89X10 <sup>-3</sup> |
| <i>GALNT2</i>     | rs4846914  | 1:230295691 | G                | A   | 0.213             | ++                     | 0.036                 | 0.015 | 0.019                 |
| <i>COBLL1</i>     | rs12328675 | 2:165540800 | T                | C   | 0.003             | --                     | -0.018                | 0.124 | 0.884                 |
| <i>CPS1</i>       | rs1047891  | 2:211540507 |                  |     |                   |                        | not on the exome chip |       |                       |
| <i>IRS1</i>       | rs2972146  | 2:227100698 | G                | T   | 0.931             | --                     | -0.079                | 0.025 | 1.69x10 <sup>-3</sup> |
| <i>ATG7</i>       | rs2606736  | 3:11400249  | C                | T   | 0.662             | ++                     | 0.007                 | 0.013 | 0.601                 |
| <i>SETD2</i>      | rs2290547  | 3:47061183  | G                | A   | 0.239             | -+                     | -0.006                | 0.015 | 0.703                 |
| <i>RBM5</i>       | rs2013208  | 3:50129399  | C                | T   | 0.863             |                        | QC- in PUUMA-MI       |       |                       |
| <i>STAB1</i>      | rs13326165 | 3:52532118  | A                | G   | 0.978             | ++                     | 0.006                 | 0.043 | 0.895                 |
| <i>GSK3B</i>      | rs6805251  | 3:119560606 |                  |     |                   |                        | not on the exome chip |       |                       |
| <i>C4orf52</i>    | rs10019888 | 4:26062990  |                  |     |                   |                        | not on the exome chip |       |                       |
| <i>FAM13A</i>     | rs3822072  | 4:89741269  |                  |     |                   |                        | not on the exome chip |       |                       |
| <i>ADH5</i>       | rs2602836  | 4:100014805 | A                | G   | 0.833             | --                     | -0.004                | 0.017 | 0.836                 |
| <i>SLC39A8</i>    | rs13107325 | 4:103188709 | C                | T   | 0.000             |                        | Monomorphic in HKUTRS |       |                       |
| <i>ARL15</i>      | rs6450176  | 5:53298025  | G                | A   | 0.437             | ++                     | 0.013                 | 0.013 | 0.310                 |
| <i>RSPO3</i>      | rs1936800  | 6:127436064 | C                | T   | 0.520             | --                     | -0.002                | 0.013 | 0.881                 |
| <i>CITED2</i>     | rs605066   | 6:139829666 | C                | T   | 0.298             | ++                     | 0.022                 | 0.014 | 0.118                 |
| <i>DAGLB</i>      | rs702485   | 7:6449272   |                  |     |                   |                        | not on the exome chip |       |                       |
| <i>SNX13</i>      | rs4142995  | 7:17919258  |                  |     |                   |                        | not on the exome chip |       |                       |
| <i>IKZF1</i>      | rs4917014  | 7:50305863  | T                | G   | 0.300             | ++                     | 0.025                 | 0.014 | 0.076                 |
| <i>KLF14</i>      | rs4731702  | 7:130433384 | C                | T   | 0.291             | ++                     | 0.058                 | 0.014 | 2.86x10 <sup>-5</sup> |
| <i>TMEM176A</i>   | rs17173637 | 7:150529449 | T                | C   | 0.012             | +-                     | -0.070                | 0.057 | 0.222                 |
| <i>PPP1R3B</i>    | rs9987289  | 8:9183358   | A                | G   | 0.988             | -+                     | 0.114                 | 0.057 | 0.045                 |
| <i>TRPS1</i>      | rs2293889  | 8:116599199 | T                | G   | 0.861             | ++                     | 0.037                 | 0.018 | 0.043                 |

**Supplementary Table 6 (continued).** Association result of known HDL cholesterol associated variants.

| Gene                | rs ID            | Position           | REF <sup>a</sup> | ALT      | FREQ <sup>b</sup> | Direction <sup>c</sup> | Effect                | s.e.         | P                            |
|---------------------|------------------|--------------------|------------------|----------|-------------------|------------------------|-----------------------|--------------|------------------------------|
| <i>TTC39B</i>       | rs581080         | 9:15305378         | G                | C        | 0.919             | +-                     | 0.025                 | 0.023        | 0.291                        |
| <b><i>ABCA1</i></b> | <b>rs1883025</b> | <b>9:107664301</b> | <b>C</b>         | <b>T</b> | <b>0.224</b>      | <b>--</b>              | <b>-0.090</b>         | <b>0.015</b> | <b>1.93x10<sup>-9</sup></b>  |
| <i>MARCH8-ALOX5</i> | rs970548         | 10:46013277        | A                | C        | 0.066             | ++                     | 0.075                 | 0.025        | 3.08x10 <sup>-3</sup>        |
| <i>AMPD3</i>        | rs2923084        | 11:10388782        | A                | G        | 0.514             | --                     | -0.016                | 0.013        | 0.196                        |
| <i>LRP4</i>         | rs3136441        | 11:46743247        | T                | C        | 0.577             | --                     | -0.003                | 0.013        | 0.789                        |
| <i>OR4C46</i>       | rs11246602       | 11:51512090        |                  |          |                   |                        | not on the exome chip |              |                              |
| <i>KAT5</i>         | rs12801636       | 11:65391317        | G                | A        | 0.425             | ++                     | 0.018                 | 0.013        | 0.159                        |
| <i>MOGAT2-DGAT2</i> | rs499974         | 11:75455021        | C                | A        | 0.265             |                        | QC- in PUUMA-MI       |              |                              |
| <i>PDE3A</i>        | rs7134375        | 12:20473758        | C                | A        | 0.270             | ++                     | 0.029                 | 0.014        | 0.041                        |
| <i>MVK</i>          | rs7134594        | 12:110000193       | C                | T        | 0.302             | ++                     | 0.029                 | 0.014        | 0.039                        |
| <i>SBNO1</i>        | rs4759375        | 12:123796238       | C                | T        | 0.285             |                        | QC- in PUUMA-MI       |              |                              |
| <i>ZNF664</i>       | rs4765127        | 12:124460167       | G                | T        | 0.079             |                        | QC- in PUUMA-MI       |              |                              |
| <i>SCARB1</i>       | rs838880         | 12:125261593       | C                | T        | 0.489             | --                     | -0.040                | 0.013        | 1.62x10 <sup>-3</sup>        |
| <i>ZBTB42-AKT1</i>  | rs4983559        | 14:105277209       | G                | A        | 0.137             | --                     | -0.008                | 0.018        | 0.662                        |
| <b><i>LIPC</i></b>  | <b>rs1532085</b> | <b>15:58683366</b> | <b>A</b>         | <b>G</b> | <b>0.544</b>      | <b>--</b>              | <b>-0.104</b>         | <b>0.013</b> | <b>5.61x10<sup>-16</sup></b> |
| <i>LACTB</i>        | rs2652834        | 15:63396867        | A                | G        | 0.985             | --                     | -0.048                | 0.052        | 0.363                        |
| <i>FTO</i>          | rs1121980        | 16:53809247        | G                | A        | 0.182             | --                     | -0.038                | 0.016        | 0.019                        |
| <b><i>CETP</i></b>  | <b>rs3764261</b> | <b>16:56993324</b> | <b>C</b>         | <b>A</b> | <b>0.167</b>      | <b>++</b>              | <b>0.272</b>          | <b>0.017</b> | <b>2.09x10<sup>-57</sup></b> |
| <i>LCAT</i>         | rs16942887       | 16:67928042        | G                | A        | 0.029             | -+                     | 0.037                 | 0.037        | 0.325                        |
| <i>CMIP</i>         | rs2925979        | 16:81534790        | T                | C        | 0.588             | ++                     | 0.049                 | 0.013        | 1.51x10 <sup>-4</sup>        |
| <i>STARD3</i>       | rs11869286       | 17:37813856        | G                | C        | 0.418             | ++                     | 0.035                 | 0.013        | 6.13x10 <sup>-3</sup>        |
| <i>ABCA8</i>        | rs4148008        | 17:66875294        | C                | G        | 0.551             |                        | QC- in PUUMA-MI       |              |                              |
| <i>PGS1</i>         | rs4129767        | 17:76403984        | G                | A        | 0.345             | ++                     | 0.014                 | 0.013        | 0.285                        |
| <i>LIPG</i>         | rs7241918        | 18:47160953        | G                | T        | 0.883             | ++                     | 0.030                 | 0.020        | 0.129                        |
| <i>MC4R</i>         | rs12967135       | 18:57849023        | G                | A        | 0.169             |                        | QC- in PUUMA-MI       |              |                              |
| <i>ANGPTL4</i>      | rs7255436        | 19:8433196         | C                | A        | 0.090             | ++                     | 0.051                 | 0.022        | 0.022                        |
| <i>ANGPTL8</i>      | rs737337         | 19:11347493        | T                | C        | 0.274             | --                     | -0.073                | 0.014        | 2.95x10 <sup>-7</sup>        |
| <i>HAS1</i>         | rs17695224       | 19:52324216        | G                | A        | 0.201             | --                     | -0.035                | 0.016        | 0.025                        |

**Supplementary Table 6 (continued).** Association result of known HDL cholesterol associated variants.

| <b>Gene</b>   | <b>rs ID</b> | <b>Position</b> | <b>REF<sup>a</sup></b> | <b>ALT</b> | <b>FREQ<sup>b</sup></b> | <b>Direction<sup>c</sup></b> | <b>Effect</b>   | <b>s.e.</b> | <b>P</b> |
|---------------|--------------|-----------------|------------------------|------------|-------------------------|------------------------------|-----------------|-------------|----------|
| <i>LILRA3</i> | rs386000     | 19:54792761     | G                      | C          | 0.571                   |                              | QC- in PUUMA-MI |             |          |
| <i>HNF4A</i>  | rs1800961    | 20:43042364     | C                      | T          | 0.015                   | --                           | -0.108          | 0.052       | 0.039    |
| <i>PLTP</i>   | rs6065906    | 20:44554015     | T                      | C          | 0.025                   |                              | QC- in PUUMA-MI |             |          |
| <i>UBE2L3</i> | rs181362     | 22:21932068     | C                      | T          | 0.487                   | +-                           | -0.016          | 0.013       | 0.202    |

Variants with GWAS significant association are shown in bold

<sup>a</sup> REF and ALT: reference and alternative effector alleles with reference to human refence genome build hg19

<sup>b</sup> FREQ: Alternative effector allele frequencies

<sup>c</sup> Direction refers to the direction of effect estimates of HKUTRS and PUUMA-MI respectively

**Supplementary Table 7.** Association result of known LDL cholesterol associated variants.

| Gene                | rs ID           | Position           | REF <sup>a</sup>      | ALT      | FREQ <sup>b</sup> | Direction <sup>c</sup> | Effect       | s.e.         | P                            |
|---------------------|-----------------|--------------------|-----------------------|----------|-------------------|------------------------|--------------|--------------|------------------------------|
| <i>PCSK9</i>        | rs2479409       | 1:55504650         | G                     | A        | 0.311             | --                     | -0.005       | 0.014        | 0.725                        |
| <b><i>SORT1</i></b> | <b>rs629301</b> | <b>1:109818306</b> | <b>G</b>              | <b>T</b> | <b>0.937</b>      | <b>++</b>              | <b>0.220</b> | <b>0.026</b> | <b>2.01x10<sup>-17</sup></b> |
| <i>ANXA9-CERS2</i>  | rs267733        | 1:150958836        | A                     | G        | 0.035             | +-                     | -0.057       | 0.035        | 0.099                        |
| <i>APOB</i>         | rs1367117       | 2:21263900         | G                     | A        | 0.134             | ++                     | 0.054        | 0.019        | 3.96x10 <sup>-3</sup>        |
| <i>ABCG5/8</i>      | rs4299376       | 2:44072576         | G                     | T        | 0.994             | --                     | -0.116       | 0.083        | 0.164                        |
| <i>EHBP1</i>        | rs2710642       | 2:63149557         | G                     | A        | 0.696             | ++                     | 0.058        | 0.014        | 2.41x10 <sup>-5</sup>        |
| <i>INSIG2</i>       | rs10490626      | 2:118835841        | G                     | A        | 0.001             | ++                     | 0.156        | 0.209        | 0.455                        |
| <i>LOC84931</i>     | rs2030746       | 2:121309488        | C                     | T        | 0.479             | --                     | 0.009        | 0.013        | 0.491                        |
| <i>FN1</i>          | rs1250229       | 2:216304384        | T                     | C        | 0.915             | ++                     | 0.050        | 0.023        | 0.028                        |
| <i>CMTM6</i>        | rs7640978       | 3:32533010         | C                     | T        | 0.055             | --                     | -0.064       | 0.028        | 0.020                        |
| <i>ACAD11</i>       | rs17404153      | 3:132163200        | G                     | T        | 0.124             | --                     | -0.018       | 0.019        | 0.346                        |
| <i>CSNK1G3</i>      | rs4530754       | 5:122855416        | G                     | A        | 0.347             | ++                     | 0.027        | 0.013        | 0.045                        |
| <i>MYLIP</i>        | rs3757354       | 6:16127407         | C                     | T        | 0.392             | --                     | -0.014       | 0.013        | 0.287                        |
| <i>HFE</i>          | rs1800562       | 6:26093141         | G                     | A        | 0.001             | Monomorphic in HKUTRS  |              |              |                              |
| <i>LPA</i>          | rs1564348       | 6:160578860        | T                     | C        | 0.004             | --                     | -0.009       | 0.098        | 0.927                        |
| <i>MIR148A</i>      | rs4722551       | 7:25991826         | T                     | C        | 0.017             | QC- in PUUMA-MI        |              |              |                              |
| <i>SOX17</i>        | rs10102164      | 8:55421614         | G                     | A        | 0.214             | ++                     | 0.034        | 0.015        | 0.027                        |
| <i>PLEC1</i>        | rs11136341      | 8:145043543        | A                     | G        | 0.119             | QC- in PUUMA-MI        |              |              |                              |
| <i>ABO</i>          | rs9411489       | 9:136155000        | C                     | T        | 0.200             | ++                     | 0.049        | 0.016        | 1.90x10 <sup>-3</sup>        |
| <i>ST3GAL4</i>      | rs11220462      | 11:126243952       | G                     | A        | 0.346             | ++                     | 0.014        | 0.013        | 0.289                        |
| <i>BRCA2</i>        | rs4942486       | 13:32953388        | T                     | C        | 0.545             | --                     | -0.018       | 0.013        | 0.159                        |
| <i>NYNRIN</i>       | rs8017377       | 14:24883887        | G                     | A        | 0.054             | --                     | -0.006       | 0.028        | 0.839                        |
| <i>OSBPL7</i>       | rs7206971       | 17:45425115        | G                     | A        | 0.264             | ++                     | 0.012        | 0.014        | 0.399                        |
| <i>APOH-PRXCA</i>   | rs1801689       | 17:64210580        | A                     | C        | 0.000             | Monomorphic in HKUTRS  |              |              |                              |
| <i>LDLR</i>         | rs6511720       | 19:11202306        | G                     | T        | 0.009             | --                     | -0.163       | 0.068        | 0.016                        |
| <i>APOE</i>         | rs4420638       | 19:45422946        | A                     | G        | 0.102             | QC- in PUUMA-MI        |              |              |                              |
| <i>SPTLC3</i>       | rs364585        | 20:12962718        | A                     | G        | 0.577             | ++                     | 0.010        | 0.013        | 0.441                        |
| <i>SNX5</i>         | rs2328223       | 20:17845921        | not on the exome chip |          |                   |                        |              |              |                              |

**Supplementary Table 7 (continued).** Association result of known LDL cholesterol associated variants.

| <b>Gene</b>  | <b>rs ID</b> | <b>Position</b> | <b>REF<sup>a</sup></b> | <b>ALT</b> | <b>FREQ<sup>b</sup></b> | <b>Direction<sup>c</sup></b> | <b>Effect</b> | <b>s.e.</b> | <b>P</b> |
|--------------|--------------|-----------------|------------------------|------------|-------------------------|------------------------------|---------------|-------------|----------|
| <i>TOP1</i>  | rs6029526    | 20:39672618     | T                      | A          | 0.820                   | ++                           | 0.017         | 0.016       | 0.313    |
| <i>MTMR3</i> | rs5763662    | 22:30378703     | C                      | T          | 0.104                   | ++                           | 0.037         | 0.021       | 0.075    |

Variants with GWAS significant association are shown in bold

<sup>a</sup> REF and ALT: reference and alternative effector alleles with reference to human refence genome build hg19

<sup>b</sup> FREQ: Alternative effector allele frequencies

<sup>c</sup> Direction refers to the direction of effect estimates of HKUTRS and PUUMA-MI respectively

**Supplementary Table 8.** Association result of known total cholesterol associated variants.

| Gene            | rs ID      | Position     | REF <sup>a</sup> | ALT | FREQ <sup>b</sup> | Direction <sup>c</sup> | Effect                | s.e.  | P                     |
|-----------------|------------|--------------|------------------|-----|-------------------|------------------------|-----------------------|-------|-----------------------|
| <i>ASAP3</i>    | rs1077514  | 1:23766233   | C                | T   | 0.668             | +-                     | -0.009                | 0.013 | 0.516                 |
| <i>LDLRAP1</i>  | rs12027135 | 1:25775733   | A                | T   | 0.295             | ++                     | 0.024                 | 0.014 | 0.082                 |
| <i>EVI5</i>     | rs7515577  | 1:93009438   | C                | A   | 0.960             | -+                     | 0.021                 | 0.032 | 0.516                 |
| <i>MOSC1</i>    | rs2642442  | 1:220973563  |                  |     |                   |                        | not on the exome chip |       |                       |
| <i>IRF2BP2</i>  | rs514230   | 1:234858597  | A                | T   | 0.212             |                        | QC- in PUUMA-MI       |       |                       |
| <i>RAB3GAP1</i> | rs7570971  | 2:135837906  | C                | A   | 1.000             |                        | QC- in PUUMA-MI       |       |                       |
| <i>ABCB11</i>   | rs2287623  | 2:169830155  | G                | A   | 0.755             | +-                     | -0.020                | 0.015 | 0.167                 |
| <i>FAM117B</i>  | rs11694172 | 2:203532304  | A                | G   | 0.148             | ++                     | 0.017                 | 0.018 | 0.330                 |
| <i>UGT1A1</i>   | rs11563251 | 2:234679384  | C                | T   | 0.093             | --                     | -0.031                | 0.022 | 0.153                 |
| <i>RAF1</i>     | rs2290159  | 3:12628920   |                  |     |                   |                        | not on the exome chip |       |                       |
| <i>PXK</i>      | rs13315871 | 3:58381287   | G                | A   | 0.002             | +-                     | 0.020                 | 0.139 | 0.884                 |
| <i>HMGCR</i>    | rs12916    | 5:74656539   | T                | C   | 0.530             |                        | QC- in PUUMA-MI       |       |                       |
| <i>TIMD4</i>    | rs6882076  | 5:156390297  | T                | C   | 0.731             | ++                     | 0.058                 | 0.014 | 5.34x10 <sup>-5</sup> |
| <i>HLA</i>      | rs3177928  | 6:32412435   | G                | A   | 0.047             | ++                     | 0.023                 | 0.030 | 0.440                 |
| <i>C6orf106</i> | rs2814982  | 6:34546560   | C                | T   | 0.080             | ++                     | 0.039                 | 0.023 | 0.089                 |
| <i>KCNK17</i>   | rs2758886  | 6:39250837   |                  |     |                   |                        | not on the exome chip |       |                       |
| <i>FRK</i>      | rs9488822  | 6:116312893  |                  |     |                   |                        | not on the exome chip |       |                       |
| <i>HBS1L</i>    | rs9376090  | 6:135411228  | T                | C   | 0.283             | +-                     | -0.015                | 0.014 | 0.271                 |
| <i>GPR146</i>   | rs1997243  | 7:1083777    | A                | G   | 0.002             | -+                     | 0.116                 | 0.137 | 0.397                 |
| <i>DNAH11</i>   | rs12670798 | 7:21607352   | T                | C   | 0.490             | -+                     | 0.000                 | 0.013 | 0.997                 |
| <i>NPC1L1</i>   | rs2072183  | 7:44579180   | G                | C   | 0.367             | -+                     | 0.002                 | 0.013 | 0.848                 |
| <i>CYP7A1</i>   | rs2081687  | 8:59388565   | T                | C   | 0.793             | --                     | -0.060                | 0.015 | 1.08x10 <sup>-4</sup> |
| <i>VLDLR</i>    | rs3780181  | 9:2640759    | A                | G   | 0.093             | --                     | -0.039                | 0.022 | 0.072                 |
| <i>VIM-CUBN</i> | rs10904908 | 10:17260290  | A                | G   | 0.681             | -+                     | 0.027                 | 0.013 | 0.048                 |
| <i>GPAM</i>     | rs2255141  | 10:113933886 | A                | G   | 0.700             | --                     | -0.034                | 0.014 | 0.014                 |
| <i>SPTY2D1</i>  | rs10128711 | 11:18632984  | T                | C   | 0.519             |                        | QC- in PUUMA-MI       |       |                       |
| <i>PHLDB1</i>   | rs11603023 | 11:118486067 | T                | C   | 0.744             | -+                     | 0.004                 | 0.014 | 0.768                 |
| <i>UBASH3B</i>  | rs7941030  | 11:122522375 | T                | C   | 0.284             | ++                     | 0.012                 | 0.014 | 0.380                 |

**Supplementary Table 8 (continued).** Association result of known total cholesterol associated variants.

| Gene              | rs ID      | Position     | REF <sup>a</sup> | ALT | FREQ <sup>b</sup> | Direction <sup>c</sup> | Effect                | s.e.  | P                     |
|-------------------|------------|--------------|------------------|-----|-------------------|------------------------|-----------------------|-------|-----------------------|
| <i>PHC1-A2ML1</i> | rs4883201  | 12:9082581   | A                | G   | 0.324             | --                     | -0.023                | 0.013 | 0.083                 |
| <i>BRAP</i>       | rs11065987 | 12:112072424 | A                | G   | 0.003             | --                     | -0.269                | 0.112 | 0.017                 |
| <i>HNF1A</i>      | rs1169288  | 12:121416650 | A                | C   | 0.413             | ++                     | 0.047                 | 0.013 | 2.06x10 <sup>-4</sup> |
| <i>HPR</i>        | rs2000999  | 16:72108093  | G                | A   | 0.258             |                        | QC- in PUUMA-MI       |       |                       |
| <i>DLG4</i>       | rs314253   | 17:7091650   | T                | C   | 0.482             | +-                     | -0.021                | 0.013 | 0.091                 |
| <i>CILP2</i>      | rs10401969 | 19:19407718  | T                | C   | 0.093             | --                     | -0.076                | 0.022 | 4.57x10 <sup>-4</sup> |
| <i>FLJ36070</i>   | rs492602   | 19:49206417  | A                | G   | 0.009             | +-                     | -0.004                | 0.068 | 0.957                 |
| <i>ERGIC3</i>     | rs2277862  | 20:34152782  |                  |     |                   |                        | not on the exome chip |       |                       |
| <i>MAFB</i>       | rs2902940  | 20:39091487  | A                | G   | 0.327             |                        | QC- in PUUMA-MI       |       |                       |
| <i>TOM1</i>       | rs138777   | 22:35711098  | A                | G   | 0.535             | --                     | -0.037                | 0.013 | 3.16x10 <sup>-3</sup> |
| <i>PPARA</i>      | rs4253772  | 22:46627603  | C                | T   | 0.001             | --                     | -0.223                | 0.167 | 0.181                 |

<sup>a</sup> REF and ALT: reference and alternative effector alleles with reference to human reference genome build hg19

<sup>b</sup> FREQ: Alternative effector allele frequencies

<sup>c</sup> Direction refers to the direction of effect estimates of HKUTRS and PUUMA-MI respectively

**Supplementary Table 9.** Clinical characteristics of subjects involved in quantitative blood lipids analyses.

|                                | Subjects involved in blood lipids analyses |
|--------------------------------|--------------------------------------------|
| Number                         | 5233                                       |
| Male (%)                       | 57.80                                      |
| Age* (year)                    | 58.9 ± 11.9                                |
| BMI (kg/m <sup>2</sup> )       | 25.39 ± 4.18                               |
| CAD (%)                        | 36.70                                      |
| T2DM (%)                       | 65.60                                      |
| HT (%)                         | 68.50                                      |
| SBP <sup>†</sup> (mmHg)        | 140.37 ± 23.30                             |
| DBP <sup>†</sup> (mmHg)        | 77.64 ± 10.63                              |
| Dyslipidemia (%)               | 65.60                                      |
| Use of lipid lowering drug (%) | 51.00                                      |
| TC (mmol/L)                    | 5.16 ± 1.10                                |
| HDL-C <sup>‡</sup> (mmol/L)    | 1.19(0.98-1.45)                            |
| LDL-C (mmol/L)                 | 3.15 ± 0.95                                |
| TG <sup>‡</sup> (mmol/L)       | 1.32(0.91-2.00)                            |
| Current Smoker (%)             | 11.5                                       |

Data as mean ± standard deviation or median with interquartile range.

\*Age is defined as the age at blood lipid tested.

<sup>†</sup>SBP added 10mmHg and DBP added 5mmHg if on anti-hypertensive drug.

<sup>‡</sup>Natural-log-transformed before analysis.

CAD: Coronary artery disease; T2DM: Type 2 diabetes mellitus; BMI: Body mass index; TC: Total cholesterol; HDL-C: High-density lipoprotein cholesterol; LDL-C: Low-density lipoprotein cholesterol; TG: Triglyceride; HT: Hypertension. Pre- or without treatment lipid levels are shown. Subjects with the use of lipid-lowering drug but with no record of pre-treatment lipid levels were excluded from the quantitative blood lipids study. Dyslipidaemia is defined as having one or more of the following criteria: (1) TG ≥ 1.7mmol/L; (2) HDL-C < 1.04 in males and < 1.29mmol/L in females; (3) LDL ≥ 3.4mmol/L; and (4) already on lipid-lowering drugs.



**Supplementary Table 10.** Clinical characteristics of subjects involved in CAD case-control analysis.

|                                | Non-CAD         | CAD             | P-values |
|--------------------------------|-----------------|-----------------|----------|
| Number                         | 3388            | 2372            | -        |
| Male (%)                       | 48.60           | 74.10           | <0.001   |
| Age* (year)                    | 58.34 ± 12.25   | 62.17 ± 10.62   | <0.001   |
| BMI (kg/m <sup>2</sup> )       | 25.30 ± 4.43    | 25.60 ± 3.66    | 0.010    |
| T2DM (%)                       | 63.00           | 68.80           | <0.001   |
| HT (%)                         | 60.30           | 82.20           | <0.001   |
| SBP <sup>†</sup> (mmHg)        | 137.22 ± 23.36  | 145.13 ± 21.75  | <0.001   |
| DBP <sup>†</sup> (mmHg)        | 77.92 ± 10.53   | 76.89 ± 11.04   | 0.001    |
| Dyslipidemia (%)               | 53.90           | 89.40           | <0.001   |
| Use of lipid lowering drug (%) | 27.20           | 95.70           | <0.001   |
| TC (mmol/L)                    | 5.13 ± 1.05     | 5.23 ± 1.17     | 0.001    |
| HDL-C <sup>‡</sup> (mmol/L)    | 1.25(1.03-1.52) | 1.09(0.90-1.30) | <0.001   |
| LDL-C (mmol/L)                 | 3.10 ± 0.90     | 3.26 ± 1.02     | <0.001   |
| TG <sup>‡</sup> (mmol/L)       | 1.24(0.88-1.90) | 1.50(1.10-2.20) | <0.001   |
| Current Smoker (%)             | 10.30           | 13.40           | <0.001   |

Data as mean ± standard deviation or median with interquartile range.

\*Age is defined by the age at diagnosis for cases and the age at recruitment for controls.

<sup>†</sup>SBP added 10mmHg and DBP added 5mmHg if on anti-hypertensive drug.

<sup>‡</sup>Natural-log-transformed before analysis.

CAD: Coronary artery disease; T2DM: Type 2 diabetes mellitus; BMI: Body mass index; TC: Total cholesterol; HDL-C: High-density lipoprotein cholesterol; LDL-C: Low-density lipoprotein cholesterol; TG: Triglyceride; HT: Hypertension. Pre- or without treatment lipid levels are shown. Subjects with the use of lipid-lowering drug but with no record of pre-treatment lipid levels were excluded from the quantitative blood lipids study. Dyslipidaemia is defined as having one or more of the following criteria: (1) TG ≥ 1.7mmol/L; (2) HDL-C < 1.04 in males and < 1.29mmol/L in females; (3) LDL ≥ 3.4mmol/L; and (4) already on lipid-lowering drugs.

**Supplementary Table 11.** Cohort descriptions of PUUMA-MI and HUNT-MI.

| Trait                    | Mean value (S.D.)     |                      |
|--------------------------|-----------------------|----------------------|
|                          | PUUMA-MI<br>(N=7,452) | HUNT-MI<br>(N=5,643) |
| Ancestry                 | Chinese               | Norwegian            |
| Age (year)               | 58.5 (9.6)            | 79.2 (12.4)          |
| Female                   | 5,556 (55.6%)         | 2,003 (33.7%)        |
| BMI (kg/m <sup>2</sup> ) | 26.8 (4.4)            | 26.9 (3.7)           |
| LDL-C (mg/dL)            | 119.1 (35.2)          | 160.1 (43.3)         |
| HDL-C (mg/dL)            | 52.2 (17.0)           | 51.0 (15.1)          |
| TC (mg/dL)               | 197.2 (52.2)          | 246.3 (47.6)         |
| TG (mg/dL)               | 145.3 (107.2)         | 178.9 (103.4)        |
| SBP (mg/dL)              | 133.0 (17.4)          | 145.2 (21.9)         |
| DBP (mg/dL)              | 76.2 (19.0)           | 83.5 (11.7)          |
| MI Cases                 | 1,700 (19.5%)         | 2,969 (50.0%)        |

Values are expressed as mean with standard deviation in parenthesis.

MI: Myocardial infarction

## Supplementary Note 1

### ***The University of Hong Kong Theme-based Research Scheme (HKU-TRS)***

**Hong Kong Chinese CAD Cohort.** The Hong Kong Chinese coronary artery disease (CAD) cohort is an on-going prospective cohort study on the risk factors and clinical outcomes in Chinese patients with established CAD. This study was first started in 2004-2005 in the Queen Mary Hospital. In brief, consecutive patients underwent invasive coronary angiogram for assessment and treatment of CAD in the Queen Mary Hospital were screened. Those patients suffered from significant CAD with at least 50% stenosis in one or more of the epicardial coronary artery as determined by coronary angiogram were invited to join this study. Detailed anthropometric and demographic data, including major cardiovascular risk factors and medical, drug and family histories were collected during their hospital admission or in the outpatient clinic follow-up. After an overnight fast, blood samples were drawn, with written informed consent, for DNA and biochemical analyses. Ethical approval was obtained from the Institutional Review Board of the University of Hong Kong/Hospital Authority Hong Kong West Cluster.

**Hong Kong Cardiovascular Risk Factors Prevalence Study (CRISPS).** The Hong Kong Cardiovascular Risk Factors Prevalence Study (CRISPS) is an on-going population-based prospective study of cardiovascular risk factors in Hong Kong<sup>2</sup>. Details of the CRISPS cohort were previously described<sup>3-6</sup>. In brief, CRISPS was first commenced as a population-based survey in 1995-1996 (CRISPS1). 2895 unrelated subjects of Chinese ancestry were selected randomly by their telephone numbers from the Hong Kong population, and were invited to undergo a comprehensive assessment of cardiovascular risks at the Queen Mary Hospital. After the baseline assessment, subjects were invited to participate in the prospective follow-up assessments for the development of major cardiovascular risk factors in 2000-2004 (CRISPS2), 2005-2008 (CRISPS3) and 2010-2012 (CRISPS4). At each follow-up visit, subjects' anthropometric and demographic data were collected. A detailed questionnaire was used to record the subjects' medical, drug and family histories of major cardiovascular risk factors. Fasting venous blood were obtained after an overnight fast for the measurement of lipids and glucose levels. A 75-gram OGTT was performed in all subjects not on anti-diabetic medications. Buffy coat were collected for DNA extraction. Serum and plasma samples were stored in aliquots at -80°C for biochemical analyses. All participants gave written informed consent and the study protocol was approved by the Institutional Review Board of the University of Hong Kong/Hospital Authority Hong Kong West Cluster.

**Hong Kong West Diabetes Registry (HKWDR).** The Hong Kong West Diabetes Registry (HKWDR) was commenced in August 2008. All patients with type 2 diabetes who were on regular follow-up at the medical specialist clinics of the Hong Kong West Cluster were invited to undergo comprehensive clinical assessments and laboratory investigations to determine their control of diabetes and related cardiovascular risk factors, and the presence of diabetic complications, including cardiovascular diseases, diabetic retinopathy, and diabetic nephropathy. The subjects' anthropometric and demographic data were collected. A detailed questionnaire was used to record the subjects' medical, drug and family histories of major cardiovascular risk factors. After an overnight fast, blood samples were drawn, with written informed consent, for DNA and biochemical analyses. Ethical approval was obtained from the Institutional Review Board of the University of Hong Kong/Hospital Authority Hong Kong West Cluster.

***The Joint Institute of the Peking University Health Science Center and the University of Michigan Medical School study of Myocardial Infarction (PUUMA-MI)***

PUUMA-MI is a large-scale project designed to study cardiovascular disease and related traits, including myocardial infarction (MI) and plasma lipid levels, in China. For samples collected from Peking University Third Hospital, blood samples were taken in the morning after an overnight fast and collected into vacuum tubes containing EDTA for the measurement of plasma lipids. Clinical chemical analyses were conducted at the central chemistry lab of Peking University Third Hospital. Using Beckman Coulter AU 5800 Auto-Analyzer (Tokyo, Japan), total cholesterol (TC) was measured by an enzymatic method (Baiding Biological Engineering Ltd, Beijing, China); triglycerides (TG) were measured by an enzymatic (with peroxidase) method (Biosino Bio-Technology Co. Ltd, Beijing, China); and high-density lipoprotein cholesterol (HDL-C) and low-density lipoprotein cholesterol (LDL-C) were measured by a liquid selective detergent method (Sekisui Medical Co. Ltd, Tokyo, Japan). The day-to-day coefficients of variation were 0.9%-2.0% for TC, 1.6% for HDL-C, 1.5% for LDL-C and 0.8% - 2.1% for TG. For samples from Peking University First Hospital biorepository, fasting plasma lipid levels (including serum TC, LDL-C, HDL-C and TG) were tested using Roche cobas 8000 modular analyzer series (Indianapolis, IN, USA) in Beijing Shijingshan cohort samples (N=836) and Beckman coulter UniCel DxC 800 Synchron (Brea, CA, USA) in Peking University First Hospital-based samples (N=7,339) after overnight fasting, respectively.

## Supplementary Methods

### Asian Exomechip

The Illumina Infinium HumanExome BeadChip (HumanExome-12v1\_A) was primarily designed for examining 242,901 markers, including >200,000 protein-altering variants (non-synonymous, stop and splicing) identified from ~12,000 sequenced genomes and exomes. It also included >20,000 non-exonic variants contributed by multiple consortia, e.g. NHLBI Exome Sequencing Project, as well as variants designed for sample tracking, ancestry differentiation and establishing segments of identity by descent (IBD) ([http://genome.sph.umich.edu/wiki/Exome\\_Chip\\_Design](http://genome.sph.umich.edu/wiki/Exome_Chip_Design)). While the majority of the discovery sequencing exomes are of European ancestry, the rare variants included are constrained to those observed mainly in Europeans. To augment the array with variants more relevant to Chinese population, we further included approximately 30K markers identified from three exome sequencing projects on ~1000 Chinese samples. Additionally, a custom set of 29,930 variants for fine-mapping or GWAS follow-up studies were added. The third custom panel of 1,501 SNPs specifically designed for candidate gene association analysis at HKU-TRS was not shared between cohorts, thereby not considered in the meta-analysis.

### Data quality controls

HKU-TRS. For individual-based quality control, we first removed 11 samples with low call rate (<98%) and 24 outliers with respect to genotype heterozygosity (inbreeding coefficient deviating >4 standard deviation from the mean). Relatedness check identified 40 duplicated and 178 related samples to be removed. Forty samples have problems of gender mismatch, most of which are kept in the same storage container. As a precautionary measure, we also excluded individuals (n=23) stored alongside with these samples to avoid mislabeling. In addition, gender check highlighted 13 males with possible Klinefelter syndrome. These samples were further excluded from the subsequent analysis. To investigate the existence of non-Chinese samples, we performed a principal component analysis using a panel of 22,204 independent common SNPs (MAF>0.05), 8 outliers were thus removed. Among the 5,763 samples passing quality control, we further excluded 530 subjects who have received lipid-lowering medication but with no record of pre-treatment lipid level. We further employed a SNP-based quality control that removed SNPs with >2% missingness (n=4,072) or violating Hardy-Weinberg equilibrium ( $P < 1 \times 10^{-5}$ ; n=159). While our analysis aims to identify functional variants affecting plasma lipid levels, we excluded 8,086 non-protein altering SNPs that were originally designed for quality controls. These include ancestry informative loci (AIMs) for distinguishing Europeans from native and African Americans, grid

SNPs for identifying IBD segments and fingerprint SNPs for sample tracking. After all quality control measures, 5,233 samples and 286,795 SNPs, of which 176,149 variants are monomorphic, remained in the dataset and were subject to association analysis.

PUUMA-MI.To obtain high quality genotypes, strict criteria were applied to filter out low quality genotypes. We performed plate-level, sample-level and variant-level checks to exclude poor quality genotype calls from the dataset. First, we examined the call rates for each plate, and dropped seven plates (672 samples) showing significant lower call rates and higher heterozygosity than other plates. Next, by examining the genotyping quality of each individual, we excluded 73 samples with low call rates (<99%) and 122 samples with mismatched gender between genotype and medical record. We identified and excluded 145 samples with higher than expected levels of contamination by performing BAFRegress<sup>7</sup>. For each of 377 pairs of duplicated samples, the sample with the highest call rate was retained. Furthermore, 1,189 individuals with unknown or ambiguous diagnosis of cardiovascular disease were also excluded from analyses. Last, marker-level quality control was performed to exclude 496 variants with low cluster score (<0.4), 17,245 with low call rate (<99.9%) and 2,021 that deviated from Hardy-Weinberg equilibrium ( $P < 1 \times 10^{-4}$ ). Finally, 7,452 samples and 282,456 markers were retained after quality control. Among the successfully genotyped markers, 129,306 are polymorphic in the Chinese samples. To further verify marker allele assignment, we examined the correlation between allele frequency of the PUUMA-MI Chinese samples and those of East Asian samples from 1000 Genomes Project, and a high correlation ( $r^2 = 0.98$ ) was observed.

## **Annotation**

Functions of variants as well as protein changes for nonsynonymous SNPs were annotated by KGGseq according to RefGene annotation<sup>8</sup>. In case of various functions denoted by different isoforms, the most damaging change together with the corresponding mRNA accession was represented. Allele frequency information of the Europeans and Africans was first retrieved from the Exome Variant Server (EVS) data release (ESP6500SI-V2; <http://evs.gs.washington.edu/EVS/>) based on 6503 samples drawn from NHLBI Exome Sequencing Project (ESP) and was then integrated into the annotation of KGGseq.

For non-coding variants, we looked up the possible regulatory functions using Regulome<sup>9</sup> and SNPs overlapping DNaseI hypersensitivity sites or transcriptional-related chromatin signals were further examined in the relevant cell line HepG2 of The Encyclopedia of DNA Elements (ENCODE Mar 2012

Freeze)<sup>10</sup> via UCSC Genome Browser. Expression QTL (eQTL) information was checked against eQTL browser.

## Supplementary References

1. Global Lipids Genetics, C. *et al.* Discovery and refinement of loci associated with lipid levels. *Nat Genet* **45**, 1274-83 (2013).
2. Janus, E.D. Epidemiology of cardiovascular risk factors in Hong Kong. *Clin Exp Pharmacol Physiol* **24**, 987-8 (1997).
3. Cheung, B.M. *et al.* Development of diabetes in Chinese with the metabolic syndrome: a 6-year prospective study. *Diabetes Care* **30**, 1430-6 (2007).
4. Chen, C. *et al.* High plasma level of fibroblast growth factor 21 is an Independent predictor of type 2 diabetes: a 5.4-year population-based prospective study in Chinese subjects. *Diabetes Care* **34**, 2113-5 (2011).
5. Chow, W.S. *et al.* Elevated circulating adipocyte-fatty acid binding protein levels predict incident cardiovascular events in a community-based cohort: a 12-year prospective study. *J Am Heart Assoc* **2**, e004176 (2013).
6. Cheung, C.Y. *et al.* Adiponectin gene variants and the risk of coronary heart disease: a 16-year longitudinal study. *Eur J Endocrinol* **171**, 107-15 (2014).
7. Jun, G. *et al.* Detecting and estimating contamination of human DNA samples in sequencing and array-based genotype data. *Am J Hum Genet* **91**, 839-48 (2012).
8. Li, M.X., Gui, H.S., Kwan, J.S., Bao, S.Y. & Sham, P.C. A comprehensive framework for prioritizing variants in exome sequencing studies of Mendelian diseases. *Nucleic Acids Res* **40**, e53 (2012).
9. Joshi-Tope, G. *et al.* Reactome: a knowledgebase of biological pathways. *Nucleic Acids Res* **33**, D428-32 (2005).
10. Consortium, E.P. An integrated encyclopedia of DNA elements in the human genome. *Nature* **489**, 57-74 (2012).
